# Supplementary material
Source: publisher figshare collection journal article supplement (https://acs.figshare.com/ndownloader/files/4261267)
Supplement: Supplementary file 1 [file 4261267]

# Supporting Information for:

  

## Minor Groove Binders and Drugs Targeting Proteins

  

## Cover Different Regions in Chemical (Shape) Space

Julian E. Fuchs,<sup>†</sup> Gudrun M. Spitzer,<sup>\*,†</sup> Ameera Javed,<sup>†</sup> Adam Biela,<sup>‡</sup> Christoph Kreutz,<sup>†</sup> Bernd Wellenzohn,<sup>§</sup> and Klaus R. Liedl<sup>†</sup>

*Faculty of Chemistry and Pharmacy, University of Innsbruck, Innrain 52c, A-6020 Innsbruck, Austria, Department of Pharmaceutical Chemistry, Philipps University Marburg, Marbacher Weg 6, D-35032 Marburg, Germany, and Boehringer Ingelheim Pharma GmbH & Co. KG, Birkendorfer Strasse 65, D-88397 Biberach/Riss, Germany*

E-mail: gudrun.spitzer@uibk.ac.at

### DNA Ligands Extracted From PDB Structures

Ligands extracted from crystal structures were used to generate the set of known minor groove binders (MGBs). Following structures have been used: 102D, 109D, 121D, 127D, 129D, 130D, 144D, 166D, 195D, 1D30, 1D43, 1D63, 1D64, 1EEL, 1FMQ, 1FMS, 1FTD, 1JTL, 1LEJ, 1LEX, 1M6F, 1PQQ, 1QV4, 1QV8, 1VZK, 1ZPH, 1ZPI, 227D, 263D, 289D, 298D, 2B0K, 2B3E, 2FJV, 2GYX, 2I2I, 2NLM, 302D, 311D, 328D, 360D, 403D, 442D, 443D, 445D, 449D, 453D

---

<sup>†</sup>University of Innsbruck

<sup>‡</sup>Philipps University Marburg

<sup>§</sup>Boehringer-Ingelheim

|                                                                                                 |                                                                                                 |                                                                                                   |
|-------------------------------------------------------------------------------------------------|-------------------------------------------------------------------------------------------------|---------------------------------------------------------------------------------------------------|
| <p>432D</p> 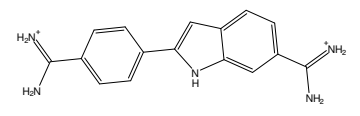   | <p>1D63</p>    | <p>227D</p>    |
| <p>102D</p>    | <p>1D64</p>    | <p>166D</p>    |
| <p>2I 2I</p>   | <p>1M6F</p>    | <p>2NLM</p>    |
| <p>2B0K</p>   | <p>1VZK</p>   | <p>360D</p>   |
| <p>2FJV</p>  | <p>289D</p>  | <p>298D</p>  |
| <p>109D</p>  | <p>311D</p>  | <p>2B3E</p>  |
| <p>1FMQ</p>  | <p>453D</p>  | <p>127D</p>  |
| <p>302D</p>  | <p>1D43</p>  | <p>121D</p>  |

|                                                                                                        |                                                                                                        |                                                                                                          |
|--------------------------------------------------------------------------------------------------------|--------------------------------------------------------------------------------------------------------|----------------------------------------------------------------------------------------------------------|
| <p><b>195D</b></p> 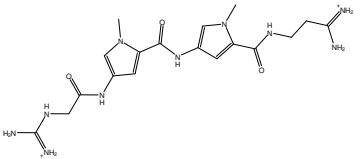   | <p><b>1LEX</b></p>    | <p><b>1EEL</b></p>    |
| <p><b>1QV8</b></p>    | <p><b>130D</b></p>    | <p><b>129D</b></p>    |
| <p><b>2GYX</b></p>    | <p><b>403D</b></p>    | <p><b>144D</b></p>    |
| <p><b>1QV4</b></p>   | <p><b>1FMS</b></p>   | <p><b>1ZPH</b></p>   |
| <p><b>1JTL</b></p>  | <p><b>1ZPI</b></p>  | <p><b>328D</b></p>  |
| <p><b>449D</b></p>  | <p><b>443D</b></p>  | <p><b>445D</b></p>  |
| <p><b>263D</b></p>  | <p><b>442D</b></p>  | <p><b>1FTD</b></p>  |

Figure 1: List of ligand structures in the set of known MGBs extracted from crystal structures. PDB codes are indicated for every ligand.

## NMR Spectroscopy

The NMR samples were prepared by from lyophilized Dickerson Drew dodecamer DNA. The DNA was dissolved together with 50  $\mu\text{M}$  sodium arsenate buffer, pH 6.5 in  $\text{H}_2\text{O}/\text{D}_2\text{O} = 9/1$ . Ligands were added from stock solutions (200  $\mu\text{M}$  for ligand **4** and 66  $\mu\text{M}$  for ligand **3**) in 50  $\mu\text{M}$  sodium arsenate buffer, pH 6.5. Data was acquired on a 600 MHz Bruker Avance III NMR instrument at the temperatures indicated.  $^1\text{H}$  NMR spectra of  $\text{H}_2\text{O}$ -samples were acquired using a double-pulsed field gradient spin-echo (DPFGSE) pulse sequence. The DNA imino resonances were assigned by aid of 2D- $^1\text{H}$ - $^1\text{H}$ -NOESY experiments.

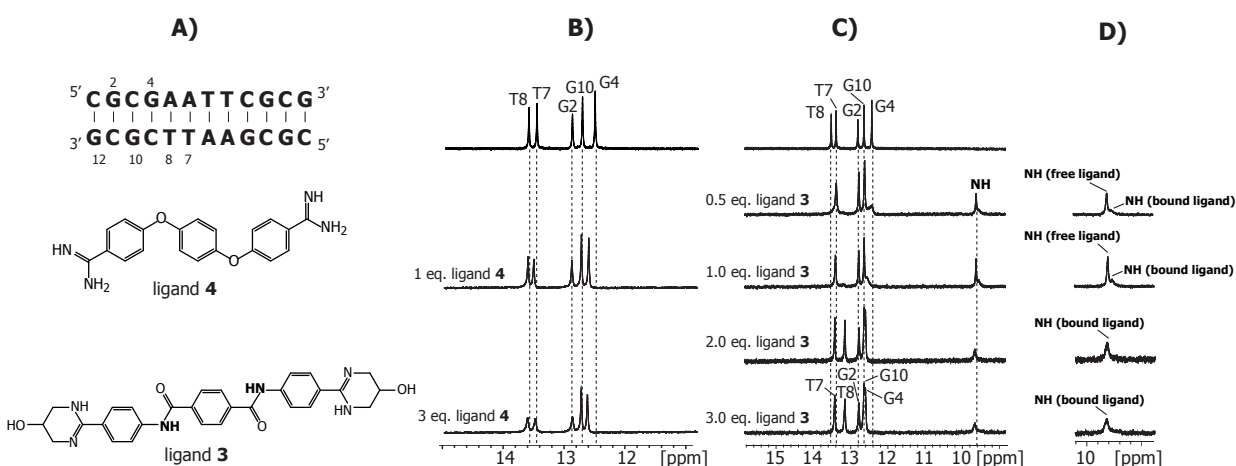

Figure 2: **(A)** Schematic representation of the Dickerson Drew dodecamer (DD DNA), ligand **3** and ligand **4**. **(B)** Monitoring of ligand **4** binding to the DD DNA. Chemical shift perturbation and line broadening effects were most pronounced for the central imino proton resonances (T8, T7 and G4). Thus, ligand **4** binds preferentially at the central tract of the Dickerson Drew dodecamer. **(C)** Monitoring of ligand **3** binding to the DD DNA. Chemical shift perturbation and line broadening effects were again pronounced for the central imino proton resonances (T8, T7 and G4). Furthermore, the amide NH resonance of ligand **3** could be assigned via a NOESY experiment. A weak NOE between T7 NH and the amide proton was also observed. **(D)** Magnification of the ligand NH region. At lower ligand concentrations (0.5 and 1.0 eq. ligand) an equilibrium between free form and the binary complex can be observed. The sharp NH resonance at 9.8 ppm arises from the free form of the ligand. A broad peak with little intensity can also be observed arising from the ligand in the DNA-bound state. Addition of another equivalent of ligand (2 eq. Ligand) shifts the equilibrium towards the binary complex. Thus, solely a broad NH peak of the ligand in the bound conformation is observed. The line broadening effect mainly arises from the shorter transverse relaxation time ( $T_2$ ) in the bound form (increased molecular weight). The complex formation seems to be saturated at 2 equivalents of ligand **3**, as the addition of another equivalent does not change the appearance of the proton spectrum.

## Rankings of Active, Unknown Compounds Found by ROCS

Table 1: New MGB identified by shape-based screening are listed together with the ranks they achieved by using the respective query molecules indicated as column headers. Their highest ranks in the NCI databases are indicated by italic numbers in the columns of the respective query molecules. 1PQQ containing a cyclic polyamide MGB does not contribute to the highest ranks. Nine out of ten new MGBs would have been found by inspecting only the best-ranked 200 compounds instead of 400.

|                    | 121D       | 1FTD       | 1JTL       | 1PQQ       | 227D       |
|--------------------|------------|------------|------------|------------|------------|
| Compound <b>1</b>  | 129        | 2195       | <i>31</i>  | <i>33</i>  | 40468      |
| Compound <b>2</b>  | 215        | 5220       | <i>35</i>  | <i>72</i>  | 62028      |
| Compound <b>3</b>  | <i>145</i> | 83         | 1383       | 7153       | 66526      |
| Compound <b>4</b>  | 3634       | 19663      | 20108      | 16140      | <i>50</i>  |
| Compound <b>5</b>  | 601        | 8385       | 12276      | 16946      | <i>103</i> |
| Compound <b>6</b>  | <i>144</i> | <i>119</i> | 419        | 3379       | 6437       |
| Compound <b>7</b>  | 1282       | 6771       | 450        | 3498       | <i>171</i> |
| Compound <b>8</b>  | 6568       | <i>43</i>  | 1683       | <i>277</i> | 42030      |
| Compound <b>9</b>  | <i>77</i>  | 888        | 3085       | 1478       | 3145       |
| Compound <b>10</b> | 2030       | 2290       | <i>376</i> | 1817       | 17562      |

## Insoluble Compounds Found by ROCS

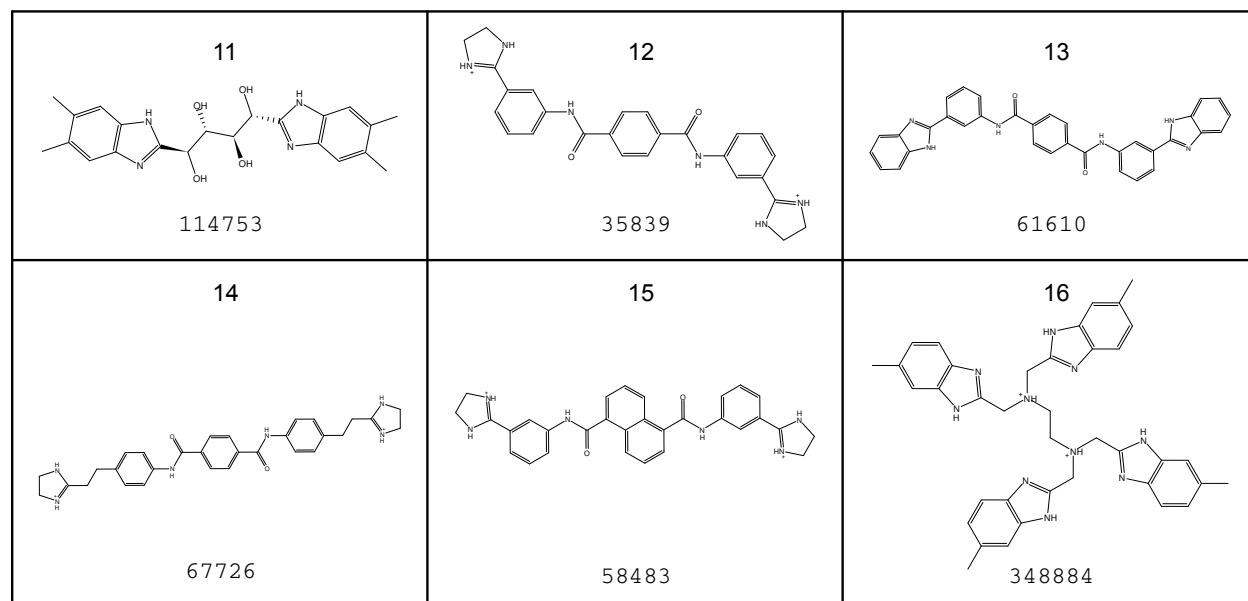

Figure 3: Compounds found by shape-based screening but not soluble under experimental conditions. Numbers at the bottom indicate NSC Codes (numbering scheme of the NCI database).

Table 2: Rankings for compounds found to be insoluble, the best rank values are marked italic.

|                    | 121D   | 1FTD       | 1JTL       | 1PQQ       | 227D  |
|--------------------|--------|------------|------------|------------|-------|
| Compound <b>11</b> | 8144   | <i>107</i> | 1570       | 7551       | 8552  |
| Compound <b>12</b> | 122    | 2069       | 27         | 75         | 4374  |
| Compound <b>13</b> | 2343   | 1615       | <i>163</i> | <i>163</i> | 90767 |
| Compound <b>14</b> | 950    | 314        | 98         | <i>193</i> | 19837 |
| Compound <b>15</b> | 1853   | 17132      | <i>326</i> | <i>12</i>  | 15545 |
| Compound <b>16</b> | 119067 | 5578       | 39494      | 73         | 19837 |

## Inactive Compounds Found by ROCS

|                                                                                                                  |                                                                                                                    |                                                                                                                    |
|------------------------------------------------------------------------------------------------------------------|--------------------------------------------------------------------------------------------------------------------|--------------------------------------------------------------------------------------------------------------------|
| <p><b>17</b></p> 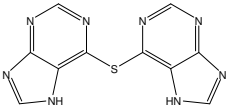 <p>39055</p>  | <p><b>18</b></p>  <p>69323</p>    | <p><b>19</b></p>  <p>377385</p> |
| <p><b>20</b></p>  <p>22905</p> | <p><b>21</b></p>  <p>652287</p> |                                                                                                                    |

Figure 4: Compounds found by shape-based screening which showed DNA affinity larger than 100  $\mu$ M (ligand **20**) or no affinity at all (all other ligands). Numbers at the bottom indicate NSC Codes (numbering scheme of the NCI database).

Table 3: Rankings for inactive compounds, the best rank values are marked italic. Results of one further query are reported here (1D64, the ligand is pentamidine) as it did not help to find additional active MGBs but was responsible for testing ligand 3h.

|                    | 121D  | 1FTD  | 1JTL  | 1PQQ  | 227D  | 1D64  |
|--------------------|-------|-------|-------|-------|-------|-------|
| Compound <b>17</b> | 19742 | 221   | 37902 | 39225 | 44643 | 83965 |
| Compound <b>18</b> | 39688 | 13386 | 12206 | 291   | 61968 | 16585 |
| Compound <b>19</b> | 66    | 2764  | 426   | 25747 | 20613 | 9893  |
| Compound <b>20</b> | 18854 | 3437  | 3700  | 11365 | 18847 | 234   |
| Compound <b>21</b> | 12119 | 30881 | 28571 | 76032 | 24    | 19659 |

## Active Compounds Found by ROCS - Known MGBs

|                         |                         |                         |
|-------------------------|-------------------------|-------------------------|
| <p>22</p> <p>357775</p> | <p>23</p> <p>9921</p>   | <p>24</p> <p>357752</p> |
| <p>25</p> <p>105371</p> | <p>26</p> <p>305831</p> | <p>27</p> <p>3067</p>   |
| <p>28</p> <p>334072</p> | <p>29</p> <p>322921</p> | <p>30</p> <p>82150</p>  |

Figure 5: These compounds were found in the NCI database by ROCS shape-based screening. They are known MGBs well documented in the literature. Numbers at the bottom indicate NSC Codes (numbering scheme of the NCI database).

Table 4: Rankings for active compounds known to be MGBs, the best rank values are marked italic. Rank one means that a ligand found in the NCI database is identical with a query ligand.

|                    | 121D       | 1FTD  | 1JTL     | 1PQQ  | 227D       |
|--------------------|------------|-------|----------|-------|------------|
| Compound <b>22</b> | 5912       | 27705 | 15156    | 69839 | 9          |
| Compound <b>23</b> | 430        | 5650  | 1131     | 10144 | <i>156</i> |
| Compound <b>24</b> | 1224       | 4059  | 3757     | 53369 | 82         |
| Compound <b>25</b> | 2123       | 2937  | 7264     | 13390 | <i>21</i>  |
| Compound <b>26</b> | 7553       | 20461 | 60586    | 91704 | <i>1</i>   |
| Compound <b>27</b> | <i>1</i>   | 821   | 3        | 76    | 3682       |
| Compound <b>30</b> | 9          | 931   | <i>1</i> | 3     | 63954      |
| Compound <b>28</b> | <i>127</i> | 3     | 803      | 6948  | 3391       |
| Compound <b>29</b> | <i>123</i> | 6     | 540      | 5301  | 1583       |



## Compounds Not Found by ROCS But Used in Experiments

|                                                                                                                           |                                                                                                                           |                                                                                                                             |
|---------------------------------------------------------------------------------------------------------------------------|---------------------------------------------------------------------------------------------------------------------------|-----------------------------------------------------------------------------------------------------------------------------|
| <p>31</p> 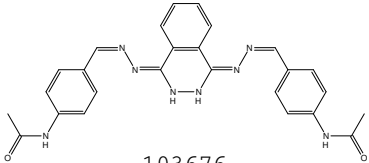 <p>103676<br/>not soluble</p> | <p>32</p>  <p>683792<br/>not soluble</p> | <p>33</p>  <p>693632<br/>not soluble</p> |
| <p>34</p>  <p>638031</p>                 | <p>35</p>  <p>22949</p>                  | <p>36</p>  <p>13189</p>                  |
| <p>37</p>  <p>23682</p>                 | <p>38</p>  <p>23766</p>                 | <p>39</p>  <p>67861</p>                 |
| <p>40</p>  <p>166100</p>               |                                                                                                                           |                                                                                                                             |

Figure 6: These compounds were selected without virtual screening. They all are inactive or have an affinity larger than 100  $\mu$ M (ligands **37** and **38**). Compounds **31**, **32**, and **33** are just not soluble under experimental conditions. All compounds were arbitrarily selected because of their elongated structures. Numbers at the bottom indicate NSC Codes (numbering scheme of the NCI database).

## MGBs and FDA-Approved Compounds Ranked in Large Databases

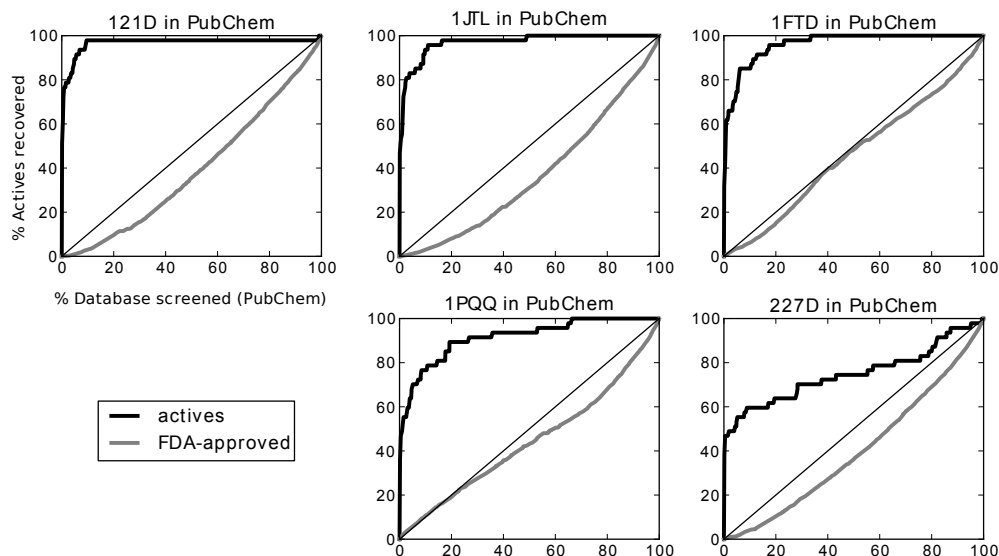

Figure 7: Ranking of active MGBs by ROCS shape-based screening in the PubChem database (121,207 entries) shows again high enrichment, as already seen for other databases. The same screening approach leads to a derichment of FDA-approved drugs in comparison with the PubChem database.

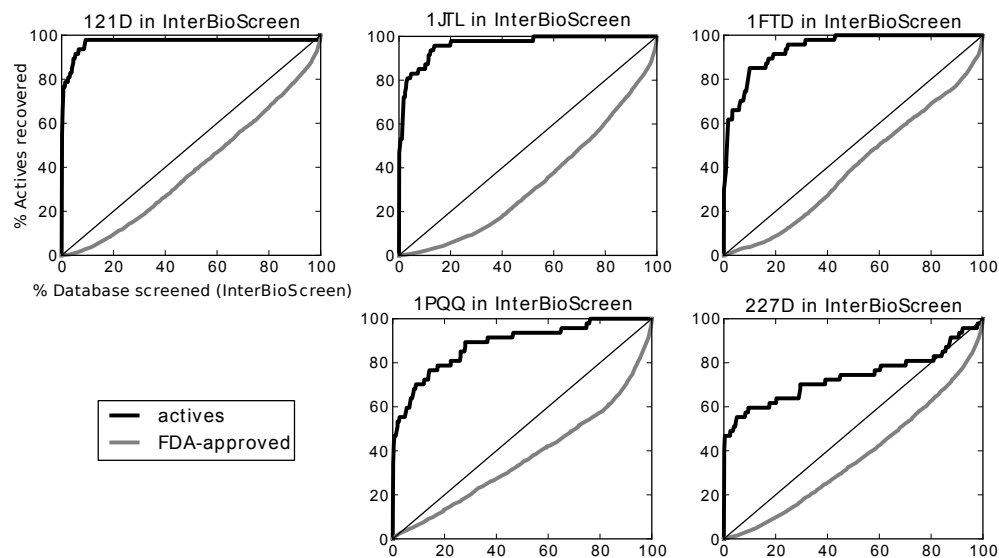

Figure 8: Ranking of active MGBs by ROCS shape-based screening in the InterBioScreen database (569,699 entries) shows again high enrichment, as already seen for other databases. The same screening approach leads to a derichment of FDA-approved drugs in comparison with the InterBioScreen database.

## MOE 2D-Descriptors Tested

Following MOE 2D-Descriptors were tested in order to efficiently enrich minor groove binders in large data sets without applying more time-consuming shape-based screening. No single descriptor nor combination was found to be able to replace minor groove binder shape description by ROCS shape-based screening. Descriptions for the metrics are extracted from the MOE manual (MOE version 2009.10).

**a\_aro** Number of aromatic atoms.

**a\_don** Number of hydrogen bond donor atoms (not counting basic atoms but counting atoms that are both hydrogen bond donors and acceptors such as -OH).

**a\_nN** Number of nitrogen atoms.

**b\_1rotN** Number of rotatable single bonds. Conjugated single bonds are not included (e.g. ester and peptide bonds).

**b\_1rotR** Fraction of rotatable single bonds:  $b\_1rotN$  divided by  $b\_heavy$ .

**b\_rotR** Fraction of rotatable bonds:  $b\_rotN$  divided by  $b\_heavy$ .

**balabanJ** Balaban's connectivity topological index.<sup>1</sup>

**b\_ar** Number of aromatic bonds.

**bpol** Sum of the absolute value of the difference between atomic polarizabilities of all bonded atoms in the molecule (including implicit hydrogens) with polarizabilities taken from Szytula and Leciejewicz.<sup>2</sup>

**chi0** Atomic connectivity index (order 0) from Hall and Kier.<sup>3,4</sup> This is calculated as the sum of  $1/\sqrt{d_i}$  over all heavy atoms  $i$  with  $d_i > 0$ .

**chi0\_C** Carbon connectivity index (order 0). This is calculated as the sum of  $1/\sqrt{d_i}$  over all carbon atoms  $i$  with  $d_i > 0$ .

**chi0v** Atomic valence connectivity index (order 0) from Hall and Kier.<sup>3,4</sup> This is calculated as the sum of  $1/\sqrt{v_i}$  over all heavy atoms  $i$  with  $v_i > 0$ .

**chi0v\_C** Carbon valence connectivity index (order 0). This is calculated as the sum of  $1/\sqrt{v_i}$  over all carbon atoms  $i$  with  $v_i > 0$ .

**chi1** Atomic connectivity index (order 1) from Hall and Kier.<sup>3,4</sup> This is calculated as the sum of  $1/\sqrt{d_i d_j}$  over all bonds between heavy atoms  $i$  and  $j$  where  $i < j$ .

**chi1\_C** Carbon connectivity index (order 1). This is calculated as the sum of  $1/\sqrt{d_i d_j}$  over all bonds between carbon atoms  $i$  and  $j$  where  $i < j$ .

**chi1v** Atomic valence connectivity index (order 1) from Hall and Kier.<sup>3,4</sup> This is calculated as the sum of  $1/\sqrt{v_i v_j}$  over all bonds between heavy atoms  $i$  and  $j$  where  $i < j$ .

**chi1v\_C** Carbon valence connectivity index (order 1). This is calculated as the sum of  $1/\sqrt{v_i v_j}$  over all bonds between carbon atoms  $i$  and  $j$  where  $i < j$ .

**Kier1** First kappa shape index.<sup>3</sup>

**Kier2** Second kappa shape index.<sup>3</sup>

**Kier3** Third kappa shape index.<sup>3</sup>

**KierA1** First alpha modified shape index.<sup>3</sup>

**KierA2** Second alpha modified shape index.<sup>3</sup>

**KierA3** Third alpha modified shape index.<sup>3</sup>

**KierFlex** Kier molecular flexibility index:  $(\text{KierA1}) (\text{KierA2}) / n$  where  $n$  denotes the number of atoms in the hydrogen suppressed graph.<sup>3</sup>

**zagreb** Zagreb index: the sum of  $d_i^2$  over all heavy atoms  $i$ .

**lip\_don** The number of OH and NH atoms.

**opr\_nrot** The number of rotatable bonds according to Oprea.<sup>5</sup>

**PEOE\_PC+** Total positive partial charge: the sum of the positive  $q_i$  with  $q_i$  denoting the partial charge of atom  $i$ .

**PEOE\_RPC+** Relative positive partial charge: the largest positive  $q_i$  divided by the sum of the positive  $q_i$ .

**petitjean** Value of  $(\text{diameter} - \text{radius}) / \text{diameter}$ .

**petitjeanSC** Petitjean graph Shape Coefficient as defined by Petitjean:<sup>6</sup>  $(\text{diameter} - \text{radius}) / \text{radius}$ .

**radius** If  $r_i$  is the largest matrix entry in row  $i$  of the distance matrix  $D$ , then the radius is defined as the smallest of the  $r_i$ .<sup>6</sup>

**VAdjMa** Vertex adjacency information (magnitude):  $1 + \log_2 m$  where  $m$  is the number of heavy-heavy bonds. If  $m$  is zero, then zero is returned.

**VDistEq** If  $m$  is the sum of the distance matrix entries then  $VdistEq$  is defined to be the sum of  $\log^2 m - p_i \log^2 p_i / m$  where  $p_i$  is the number of distance matrix entries equal to  $i$ .

**VDistMa** If  $m$  is the sum of the distance matrix entries then  $VDistMa$  is defined to be the sum of  $\log^2 m - D_{ij} \log^2 D_{ij} / m$  over all  $i$  and  $j$ .

**Weight** Molecular weight (including implicit hydrogens) in atomic mass units with atomic weights taken from Szytula and Leciejewicz.<sup>2</sup>

**weinerPath** Wiener path number: half the sum of all the distance matrix entries as defined in Balaban<sup>7</sup> and Wiener.<sup>8</sup>

**weinerPol** Wiener polarity number: half the sum of all the distance matrix entries with a value of 3 as defined in Balaban.<sup>7</sup>

## References

- (1) Balaban, A. T. *Chemical Physics Letters* **1982**, 89, 399–404.
- (2) Szytula, A.; Leciejewicz, J. *Handbook of crystal structures and magnetic properties of rare earth intermetallics*; CRC, 1994.
- (3) Hall, L.; Kier, L. In *Reviews of Computational Chemistry*; Boyd, D., Lipkowitz, K., Eds.; VCH Publishers, New York, NY (USA), 1991; Vol. 2, Chapter The molecular connectivity chi indices and kappa shape indices in structure-property modeling, pp 367–422.
- (4) Kier, L.; Hall, L. *Eur. J. Med. Chem* **1977**, 12, 334.
- (5) Oprea, T. I. *J. Comp. Aid. Mol. Des.* **2000**, 14, 251–264.
- (6) Petitjean, M. *Journal of Chemical Information and Computer Sciences* **1992**, 32, 331–337.
- (7) Balaban, A. *Theor. Chim. Acta* **1979**, 53, 355–375.
- (8) Wiener, H. *Journal of the American Chemical Society* **1947**, 69, 17–20.
